# Supplementary material for: Irreversible phase transitions in BiFeO 3 –SrTiO 3 lead-free piezoceramics
Source: Royal Society of Chemistry journal article supplement (doi:10.1039/d5ta07591b), 2026-01-01
Supplement: d5ta07591b1.pdf [file d5ta07591b1.pdf]

# Irreversible Phase Transitions in BiFeO<sub>3</sub>-SrTiO<sub>3</sub> Lead-Free Piezoceramics

Songhao Fu<sup>a</sup>, Muhammad Wasim<sup>b</sup>, Hareem Zubairi<sup>c</sup>, Xiaojiao Liu<sup>d</sup>, Annette K Kleppe<sup>d</sup>, Xinzhen Wang<sup>e</sup>, Antonio Feteira<sup>b</sup>, Ge Wang<sup>c\*</sup>, Zhilun Lu<sup>a\*</sup>

<sup>a</sup>School of Chemical and Process Engineering, University of Leeds, Leeds, LS2 9JT, UK

<sup>b</sup>School of Engineering and Built Environment, Sheffield Hallam University, Sheffield, S1 1WB UK

<sup>c</sup>Department of Materials, University of Manchester, Manchester, M13 9PL, UK

<sup>d</sup>Diamond Light Source Ltd, Harwell Science and Innovation Campus, Didcot, OX11 0DE, UK

<sup>e</sup>School of Materials Science and Engineering, Shandong University of Science and Technology, Qingdao, 266590, China

\*Correspondence authors: z.lu@leeds.ac.uk; ge.wang@manchester.ac.uk

Table S1. Summary of XRD Rietveld refinement results for (1-x)BF-xST ceramics (x = 0.42, 0.44, 0.46, and 0.48) ceramics.

| Compositions | Lattice Parameter <i>a</i> (Å) | Cell Volume (Å <sup>3</sup> ) | GOF  |
|--------------|--------------------------------|-------------------------------|------|
| x = 0.42     | 3.94588(5)                     | 61.43723(2)                   | 1.39 |
| x = 0.44     | 3.94456(4)                     | 61.37559(2)                   | 1.35 |
| x = 0.46     | 3.94357(4)                     | 61.32939(18)                  | 1.29 |
| x = 0.48     | 3.94287(4)                     | 61.29674(18)                  | 1.26 |

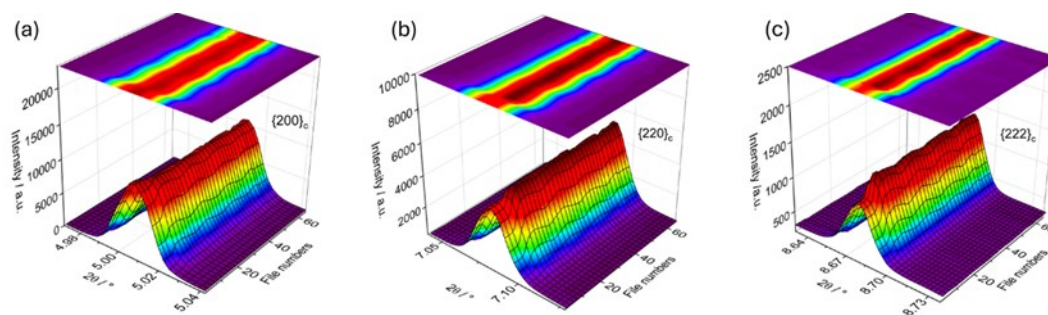

Fig. S1. 3D and contour maps of (a) {200}<sub>pc</sub> (b) {220}<sub>pc</sub> and {222}<sub>pc</sub> XRD profiles at ψ=90° of x = 0.44 ceramic during *in-situ* poling synchrotron XRD.
